# Supplementary material
Source: publisher figshare collection journal article supplement (https://acs.figshare.com/ndownloader/files/3592842)
Supplement: Supplementary file 1 [file 3592842]

# Relative Phase Change of Nearby Resonances in Temporally Delayed Sum Frequency Spectra

*Fadel Y. Shalhout, Sergey Malyk, and Alexander V. Benderskii\**

Department of Chemistry, University of Southern California, Los Angeles, CA 90089

## Supporting Information

**Table 1.** List of parameters obtained by fitting experimental PPP spectra at 0 fs and 300 fs IR-visible delay (shown in Figure 1 of the main text) to Eq. (2) of the main text.

| IR-Vis<br>Delay (fs) | $A_{\text{NR}}$<br>(a.u.) | $\omega_{\text{g}}$<br>( $\text{cm}^{-1}$ ) | $\sigma_{\text{g}}$<br>( $\text{cm}^{-1}$ ) | $\phi_{\text{NR}}$<br>(rad) | $B(\text{r}^+)$<br>(a.u.) | $B(\text{r}^-)$<br>(a.u.) | $I(\text{r}^+)$<br>( $\text{cm}^{-1}$ ) | $I(\text{r}^-)$<br>( $\text{cm}^{-1}$ ) | $\omega(\text{r}^+)$<br>( $\text{cm}^{-1}$ ) | $\omega(\text{r}^-)$<br>( $\text{cm}^{-1}$ ) |
|----------------------|---------------------------|---------------------------------------------|---------------------------------------------|-----------------------------|---------------------------|---------------------------|-----------------------------------------|-----------------------------------------|----------------------------------------------|----------------------------------------------|
| 0                    | 0.07                      | 2902                                        | 296                                         | -1.5                        | -1.0                      | -0.63                     | 20.0                                    | 16.5                                    | 2915                                         | 2975                                         |
| 300                  | 0.04                      | 2940                                        | 300                                         | 0.39                        | 0.38                      | -0.28                     | 14.3                                    | 14.0                                    | 2907                                         | 2979                                         |

**Table 2.** List of parameters obtained by fitting simulated PPP spectra at 0 fs and 300 fs IR-visible delay (shown in Figure 3 of the main text) to Eq. (2) of the main text.

| IR-Vis<br>Delay (fs) | $A_{\text{NR}}$<br>(a.u.) | $\omega_{\text{g}}$<br>( $\text{cm}^{-1}$ ) | $\sigma_{\text{g}}$<br>( $\text{cm}^{-1}$ ) | $\phi_{\text{NR}}$<br>(rad) | $B(\text{r}^+)$<br>(a.u.) | $B(\text{r}^-)$<br>(a.u.) | $\Gamma(\text{r}^+)$<br>( $\text{cm}^{-1}$ ) | $\Gamma(\text{r}^-)$<br>( $\text{cm}^{-1}$ ) | $\omega(\text{r}^+)$<br>( $\text{cm}^{-1}$ ) | $\omega(\text{r}^-)$<br>( $\text{cm}^{-1}$ ) |
|----------------------|---------------------------|---------------------------------------------|---------------------------------------------|-----------------------------|---------------------------|---------------------------|----------------------------------------------|----------------------------------------------|----------------------------------------------|----------------------------------------------|
| 0                    | 0.09                      | 2904                                        | 206                                         | -1.7                        | -1.0                      | -0.63                     | 18.6                                         | 16.3                                         | 2917                                         | 2974                                         |
| 300                  | 0.05                      | 2917                                        | 237                                         | -2.6                        | 0.39                      | -0.50                     | 16.7                                         | 13.6                                         | 2922                                         | 2979                                         |

**Table 3.** Wavelength  $\lambda$  and pulse duration  $\tau$  parameters used in Eqs. (9) and (10) to simulate the electric fields of the visible and IR pulses.

|         | $\lambda$ (nm) | $\tau$ (fs) |
|---------|----------------|-------------|
| IR      | 3440           | 80          |
| Visible | 796            | 50          |

**Table 4.** The amplitudes  $B$ , line widths  $\Gamma$  and central frequencies  $\omega$  of the resonant response for the symmetric ( $\text{r}^+$ ) and asymmetric ( $\text{r}^-$ )  $\text{CH}_3$ -stretch vibrational modes, as well as the amplitude and phase of the nonresonant background used in the simulations (Eq. (8) of the main text).

| IR-Vis<br>Delay (fs) | $A_{\text{NR}}$<br>(a.u.) | $\phi_{\text{NR}}$<br>(deg) | $B(\text{r}^+)$<br>(a.u.) | $B(\text{r}^-)$<br>(a.u.) | $\Gamma(\text{r}^+)$<br>( $\text{cm}^{-1}$ ) | $\Gamma(\text{r}^-)$<br>( $\text{cm}^{-1}$ ) | $\omega(\text{r}^+)$<br>( $\text{cm}^{-1}$ ) | $\omega(\text{r}^-)$<br>( $\text{cm}^{-1}$ ) |
|----------------------|---------------------------|-----------------------------|---------------------------|---------------------------|----------------------------------------------|----------------------------------------------|----------------------------------------------|----------------------------------------------|
| 0                    | 130                       | 245                         | -0.1                      | -0.07                     | 12                                           | 10                                           | 2915                                         | 2964                                         |
| 300                  | $1.5 \times 10^8$         | 190                         | 0.1                       | 0.07                      | 12                                           | 8                                            | 2915                                         | 2975                                         |

Note: the nonresonant background amplitude  $A_{\text{NR}}$  for the 300 fs delayed case is large because it represents interaction with the (very weak) leading edge of the visible pulse (see Figure 2 of the main text). The amplitude of the visible pulse at -300 fs could not be quantified as it was below our detection limit, and thus the spectra for the 300 fs delay are fit using  $A_{\text{NR}}$  as an independent adjustable parameter.
